# Supplementary material for: Species-Specific Response to Climate Change: Evident through Retrospective Analysis Using Tree Ring Data
Source: MDPI journal article supplement (doi:10.3390/f14040737), 2023-04-03
Supplement: s1 [file s1]

**Table S1.** Location of the sample trees (Forest name, Altitude, Aspect, Latitude and Longitude).

| Tree species             | Forest name  | Altitude (m) | Slope (°) | Aspect | Latitude | Longitude |
|--------------------------|--------------|--------------|-----------|--------|----------|-----------|
| <i>Abies spectabilis</i> | Hanumante CF | 2759         | 22.5      | SE     | 27.64900 | 86.18475  |
| <i>Abies spectabilis</i> | Hanumante CF | 2759         | 22.5      | SE     | 27.64894 | 86.18478  |
| <i>Abies spectabilis</i> | Hanumante CF | 2753         | 38        | NE     | 27.64795 | 86.18756  |
| <i>Abies spectabilis</i> | Hanumante CF | 2930         | 24.3      | NE     | 27.65431 | 86.18735  |
| <i>Abies spectabilis</i> | Hanumante CF | 2930         | 24.3      | NE     | 27.65433 | 86.18758  |
| <i>Abies spectabilis</i> | Hanumante CF | 2912         | 31.6      | SE     | 27.65408 | 86.18781  |
| <i>Abies spectabilis</i> | Hanumante CF | 2906         | 4.6       | NE     | 27.65437 | 86.18786  |
| <i>Abies spectabilis</i> | Hanumante CF | 2917         | 7.1       | SE     | 27.65462 | 86.18759  |
| <i>Abies spectabilis</i> | Hanumante CF | 2928         | 7.1       | SE     | 27.65500 | 86.18763  |
| <i>Abies spectabilis</i> | Hanumante CF | 2935         | 12.6      | SE     | 27.65527 | 86.18758  |
| <i>Abies spectabilis</i> | Hanumante CF | 2952         | 30.1      | SW     | 27.65544 | 86.18742  |
| <i>Abies spectabilis</i> | Hanumante CF | 2947         | 28.9      | SE     | 27.65558 | 86.18729  |
| <i>Abies spectabilis</i> | Hanumante CF | 2955         | 35.8      | SE     | 27.65570 | 86.18693  |
| <i>Abies spectabilis</i> | Hanumante CF | 2973         | 36.3      | SE     | 27.65567 | 86.18674  |
| <i>Abies spectabilis</i> | Hanumante CF | 2965         | 35.3      | SE     | 27.65580 | 86.18667  |
| <i>Abies spectabilis</i> | Hanumante CF | 2998         | 36.4      | SE     | 27.65588 | 86.18633  |
| <i>Abies spectabilis</i> | Hanumante CF | 3030         | 38.1      | NW     | 27.65687 | 86.18636  |
| <i>Tsuga dumosa</i>      | Hanumante CF | 2849         | 31.4      | SE     | 27.65195 | 86.18871  |
| <i>Tsuga dumosa</i>      | Hanumante CF | 2844         | 33.8      | SE     | 27.65201 | 86.18882  |
| <i>Tsuga dumosa</i>      | Hanumante CF | 2768         | 40        | NE     | 27.64810 | 86.18715  |
| <i>Tsuga dumosa</i>      | Hanumante CF | 2769         | 40        | NE     | 27.64826 | 86.18719  |
| <i>Tsuga dumosa</i>      | Hanumante CF | 2772         | 40        | NE     | 27.64813 | 86.18728  |
| <i>Tsuga dumosa</i>      | Hanumante CF | 2767         | 38        | NE     | 27.64784 | 86.18758  |
| <i>Tsuga dumosa</i>      | Hanumante CF | 2755         | 37.3      | NE     | 27.64770 | 86.18764  |
| <i>Tsuga dumosa</i>      | Hanumante CF | 2753         | 32        | NE     | 27.64760 | 86.18784  |
| <i>Tsuga dumosa</i>      | Hanumante CF | 2750         | 33        | NE     | 27.64754 | 86.18801  |
| <i>Tsuga dumosa</i>      | Hanumante CF | 2752         | 12.7      | SE     | 27.64735 | 86.18798  |
| <i>Tsuga dumosa</i>      | Hanumante CF | 2752         | 12.7      | SE     | 27.64733 | 86.18781  |
| <i>Tsuga dumosa</i>      | Hanumante CF | 2749         | 27.2      | SW     | 27.64706 | 86.18759  |
| <i>Tsuga dumosa</i>      | Hanumante CF | 2741         | 24.4      | SW     | 27.64699 | 86.18754  |
| <i>Tsuga dumosa</i>      | Hanumante CF | 2747         | 40.3      | SW     | 27.64702 | 86.18703  |
| <i>Tsuga dumosa</i>      | Hanumante CF | 2744         | 35.2      | SW     | 27.64713 | 86.18689  |
| <i>Tsuga dumosa</i>      | Hanumante CF | 2733         | 29.2      | SW     | 27.64694 | 86.18683  |
| <i>Tsuga dumosa</i>      | Hanumante CF | 2753         | 32.5      | SW     | 27.64726 | 86.18707  |
| <i>Tsuga dumosa</i>      | Hanumante CF | 2760         | 34.6      | SW     | 27.64739 | 86.18699  |
| <i>Tsuga dumosa</i>      | Hanumante CF | 2755         | 33.9      | SW     | 27.64734 | 86.18646  |
| <i>Tsuga dumosa</i>      | Hanumante CF | 2763         | 26.2      | SW     | 27.64820 | 86.18616  |
| <i>Tsuga dumosa</i>      | Hanumante CF | 2777         | 16        | NW     | 27.64828 | 86.18668  |
| <i>Tsuga dumosa</i>      | Hanumante CF | 2771         | 12.1      | NE     | 27.64855 | 86.1868   |
| <i>Tsuga dumosa</i>      | Hanumante CF | 2869         | 17.4      | SE     | 27.65275 | 86.18830  |
| <i>Tsuga dumosa</i>      | Hanumante CF | 2867         | 36.6      | SE     | 27.65257 | 86.18835  |
| <i>Tsuga dumosa</i>      | Hanumante CF | 2886         | 22.5      | NE     | 27.65348 | 86.18835  |

| Tree species             | Forest name        | Altitude (m) | Slope (°) | Aspect | Latitude | Longitude |
|--------------------------|--------------------|--------------|-----------|--------|----------|-----------|
| <i>Tsuga dumosa</i>      | Bhatekhola CF      | 2747         | 38.4      | NW     | 27.67096 | 86.21570  |
| <i>Tsuga dumosa</i>      | Bhatekhola CF      | 2743         | 31.2      | NW     | 27.67069 | 86.21489  |
| <i>Abies spectabilis</i> | Bhatekhola CF      | 2767         | 10.4      | NW     | 27.67096 | 86.21597  |
| <i>Abies spectabilis</i> | Bhatekhola CF      | 2753         | 22.8      | NW     | 27.67112 | 86.21629  |
| <i>Abies spectabilis</i> | Bhatekhola CF      | 2739         | 25.3      | NW     | 27.67135 | 86.21637  |
| <i>Abies spectabilis</i> | Bhatekhola CF      | 2727         | 19.1      | NW     | 27.67164 | 86.21646  |
| <i>Abies spectabilis</i> | Bhatekhola CF      | 2715         | 18.8      | NW     | 27.67171 | 86.21663  |
| <i>Abies spectabilis</i> | Kalobhir CF        | 2755         | 14.1      | SW     | 27.67035 | 86.21613  |
| <i>Abies spectabilis</i> | Kalobhir CF        | 2741         | 26.6      | SW     | 27.67054 | 86.21561  |
| <i>Abies spectabilis</i> | Kalobhir CF        | 2755         | 17.3      | SW     | 27.67053 | 86.21651  |
| <i>Abies spectabilis</i> | Kalobhir CF        | 2762         | 21.9      | NW     | 27.67057 | 86.21671  |
| <i>Abies spectabilis</i> | Kalobhir CF        | 2760         | 30        | NW     | 27.67069 | 86.21716  |
| <i>Abies spectabilis</i> | Kalobhir CF        | 2778         | 19.9      | NW     | 27.67026 | 86.21735  |
| <i>Abies spectabilis</i> | Kalobhir CF        | 2790         | 40.6      | SW     | 27.66983 | 86.21757  |
| <i>Abies spectabilis</i> | Kalobhir CF        | 2811         | 8.4       | NW     | 27.66996 | 86.21783  |
| <i>Pinus wallichiana</i> | Jireshowri CF      | 1948         | 26.3      | SW     | 27.63221 | 86.23427  |
| <i>Pinus wallichiana</i> | Jireshowri CF      | 1948         | 26.3      | SW     | 27.63223 | 86.23451  |
| <i>Pinus wallichiana</i> | Jireshowri CF      | 1970         | 42        | SW     | 27.63236 | 86.23508  |
| <i>Pinus wallichiana</i> | Jireshowri CF      | 1972         | 42        | SW     | 27.63234 | 86.23525  |
| <i>Pinus wallichiana</i> | Jireshowri cf      | 1951         | 9         | SW     | 27.62384 | 86.23577  |
| <i>Pinus wallichiana</i> | Jireshowri cf      | 1947         | 23        | SW     | 27.62387 | 86.23565  |
| <i>Pinus wallichiana</i> | Jireshowri cf      | 1942         | 38        | NW     | 27.62386 | 86.23557  |
| <i>Pinus wallichiana</i> | Jireshowri cf      | 1943         | 38        | NW     | 27.62381 | 86.23550  |
| <i>Pinus wallichiana</i> | Jireshowri cf      | 1941         | 38        | NW     | 27.62387 | 86.23550  |
| <i>Pinus wallichiana</i> | Jireshowri cf      | 1954         | 38        | NW     | 27.62394 | 86.23558  |
| <i>Pinus wallichiana</i> | Jireshowri cf      | 1945         | 38        | NW     | 27.62393 | 86.32559  |
| <i>Pinus wallichiana</i> | Debithan kimane CF | 1867         | 16.3      | NE     | 27.62199 | 86.22856  |
| <i>Pinus wallichiana</i> | Debithan kimane CF | 1872         | 16        | NE     | 27.62174 | 86.22859  |
| <i>Pinus wallichiana</i> | Debithan kimane CF | 1852         | 12        | NE     | 27.62175 | 86.22891  |
| <i>Pinus wallichiana</i> | Debithan kimane CF | 1858         | 26.5      | NE     | 27.62243 | 86.22855  |
| <i>Pinus wallichiana</i> | Debithan kimane CF | 1859         | 26.5      | NE     | 27.62263 | 86.22052  |
| <i>Pinus wallichiana</i> | Debithan kimane CF | 1861         | 31        | NE     | 27.62257 | 86.22836  |
| <i>Pinus wallichiana</i> | Debithan kimane CF | 1890         | 27        | NE     | 27.62259 | 86.22820  |
| <i>Pinus wallichiana</i> | Debithan kimane CF | 1891         | 27        | NE     | 27.62267 | 86.22819  |
| <i>Pinus wallichiana</i> | Debithan kimane CF | 1889         | 19        | NE     | 27.62277 | 86.22795  |
| <i>Pinus wallichiana</i> | Debithan kimane CF | 1890         | 19        | NE     | 27.62284 | 86.22789  |
| <i>Pinus wallichiana</i> | Debithan kimane CF | 1897         | 24        | NE     | 27.62264 | 86.22762  |
| <i>Pinus wallichiana</i> | Debithan kimane CF | 1926         | 23        | NE     | 27.62267 | 86.22758  |
| <i>Pinus wallichiana</i> | Debithan kimane CF | 1927         | 18        | NE     | 27.62317 | 86.22729  |
| <i>Pinus wallichiana</i> | Debithan kimane CF | 1937         | 18        | NE     | 27.62341 | 86.22710  |
| <i>Pinus wallichiana</i> | Debithan kimane CF | 2000         | 17        | NE     | 27.62384 | 86.22526  |
| <i>Pinus wallichiana</i> | Debithan kimane CF | 2037         | 5         | NE     | 27.62397 | 86.22336  |
